# Supplementary material for: A decrease in rockfall probability under climate change conditions in Germany
Source: Copernicus journal article supplement (doi:10.5194/egusphere-2023-94), 2023-02-06
Supplement: Supplementary file [file egusphere-2023-94-AC1-supplement.pdf]

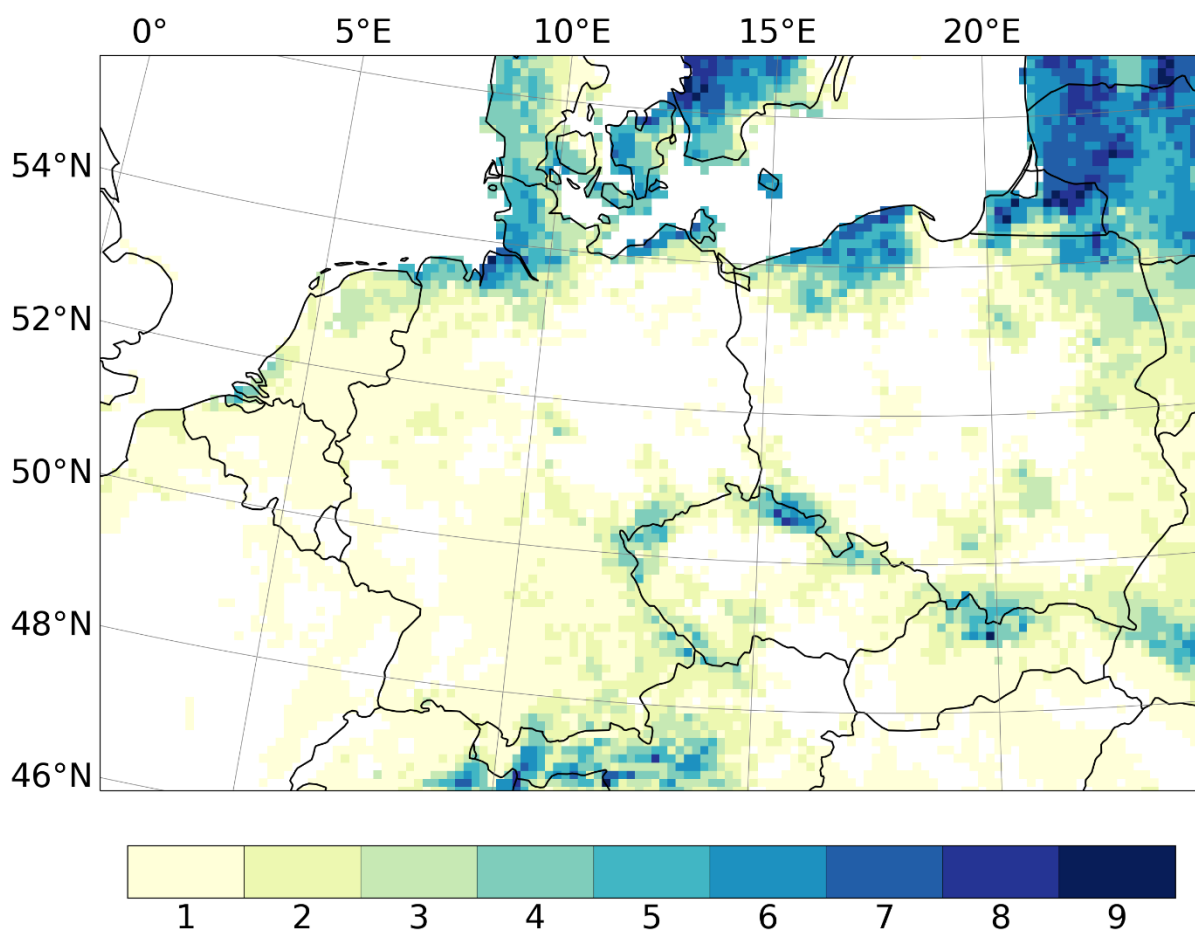

Fig: Number of models that disagree with the multi-model mean shown in Fig. 2. For these models the difference in the number of events between the historical and the scenario period is statistically significant at the 95% level but of the opposite sign.
